# Supplementary material
Source: PubMed Central journal article supplement (PMC6555668)
Supplement: NIHMS1527039-supplement-4.pdf [file NIHMS1527039-supplement-4.pdf]

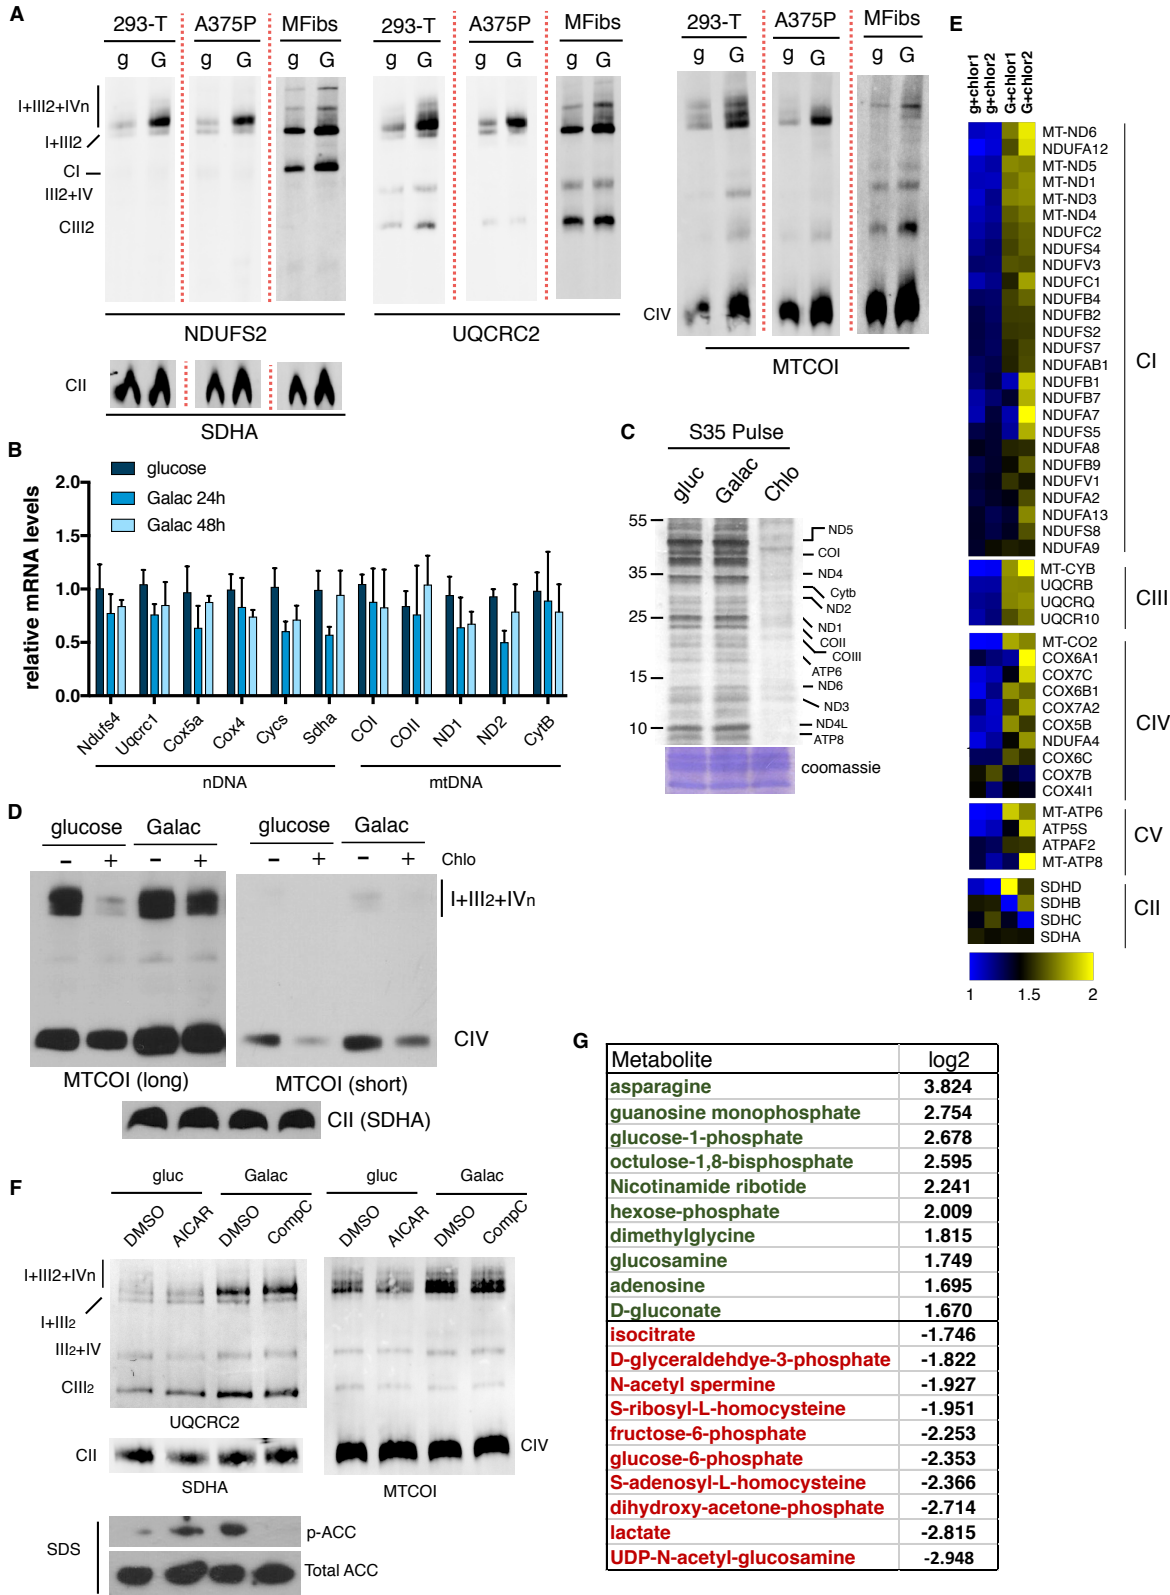

**Figure S1. Glucose deprivation boost OXHPOS function. Related to Figure 1 & 2**

**(A)** BNGE analysis in 293-T, A375P and mouse fibroblast cultured either in glucose or galactose for 48h. **(B)** qPCR analysis of mRNA levels of nuclear and mitochondrial encoded OXPHOS genes from U2OS cells cultured in either glucose or galactose. **(C)** <sup>35</sup>S pulse labeling experiment showing mitochondrial protein synthesis in cells cultured in glucose or galactose. Chloramphenicol treated cells in glucose conditions were used as a negative control. **(D)** Immunoblot of glucose or galactose cultured cells in the presence or absence of chloramphenicol for 24h. **(E)** Proteomic heat map showing elevated signal of OXPHOS components in cells cultured under galactose in the presence of chloramphenicol. **(F)** BNGE analysis from glucose or galactose-grown cells treated with the AMPK activator AICAR or inhibitor Compound C for 48h. Phosphorylation in ACC was used as indicator of AMPK activation **(G)** List of the top ten most up-regulated (green) and down-regulated (red) metabolites comparing glucose versus galactose-grown cells. SDHA was used as a loading control. Immunoblots shown are representative of >3 independent experiments. Data represent average ± SEM of three independent experiments. One-way ANOVA with Bonferroni post-test was applied. gluc, glucose. Galac, galactose. Chlo, Chloramphenicol.

**A**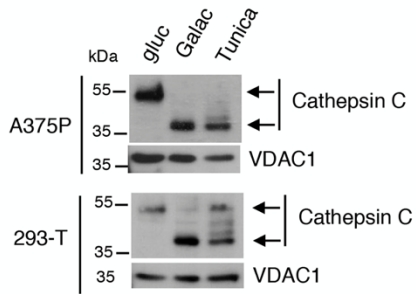**D**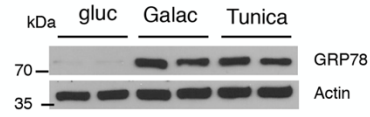**B**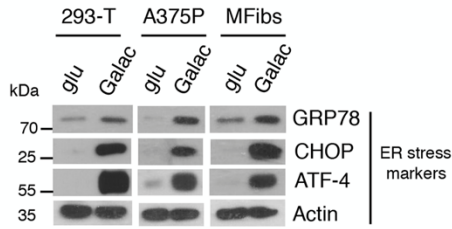**F**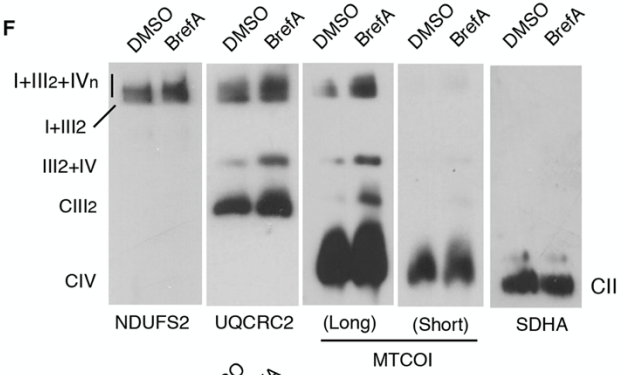**C**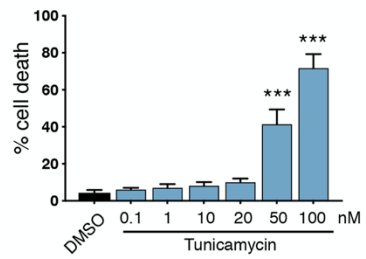**SDS**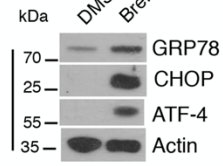**E**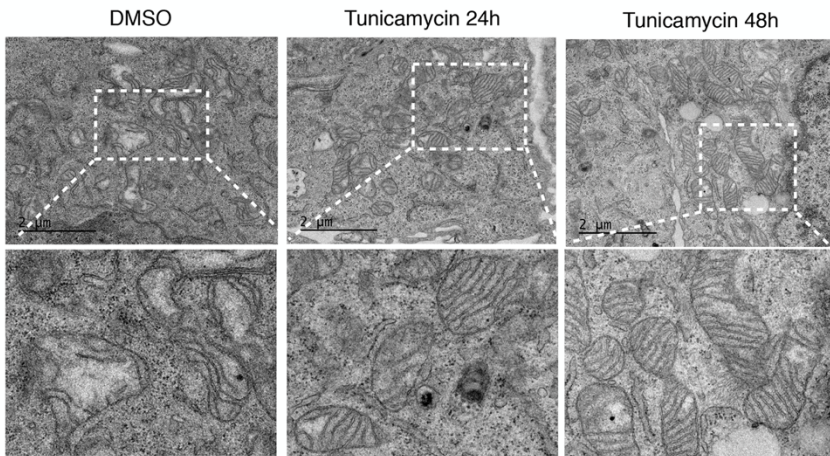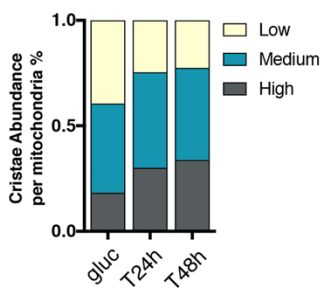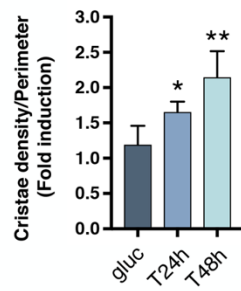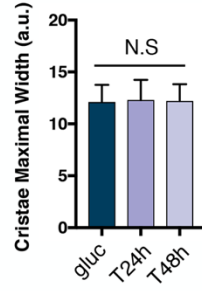

**Figure S2. OXPHOS performance is induced by ER stress. Related to Figure 2**

(A) Immunoblots showing a shift in migration of Cathepsin C due to impaired ER protein glycosylation in the indicated cell lines. (B) Western blot analysis of ER stress markers: GRP78/BiP, CHOP and ATF4 in U2OS cells cultured in galactose at the indicated time points or in 293-T, A375P and mouse fibroblast at 48h. (C) U2OS cells were treated with increasing doses of tunicamycin for 48h and cell death was analyzed by Propidium Iodide Uptake and Flow Cytometry. (D) GRP78 levels in U2OS cells after tunicamycin or galactose treatment. (E) EM analysis of mitochondrial cristae morphology, abundance and density assayed in 24h and 48h tunicamycin treated cells. Data represent average  $\pm$  SEM of three independent experiments. (F) SC levels and ER stress markers in Brefeldin A treated cells at 48h. Immunoblots shown are representative of >3 independent experiments. Tubulin, VDAC1, Actin or SDHA was used as a loading control. gluc, glucose. Galac, galactose. Tunica, tunicamycin. BrefA, Brefeldin A.

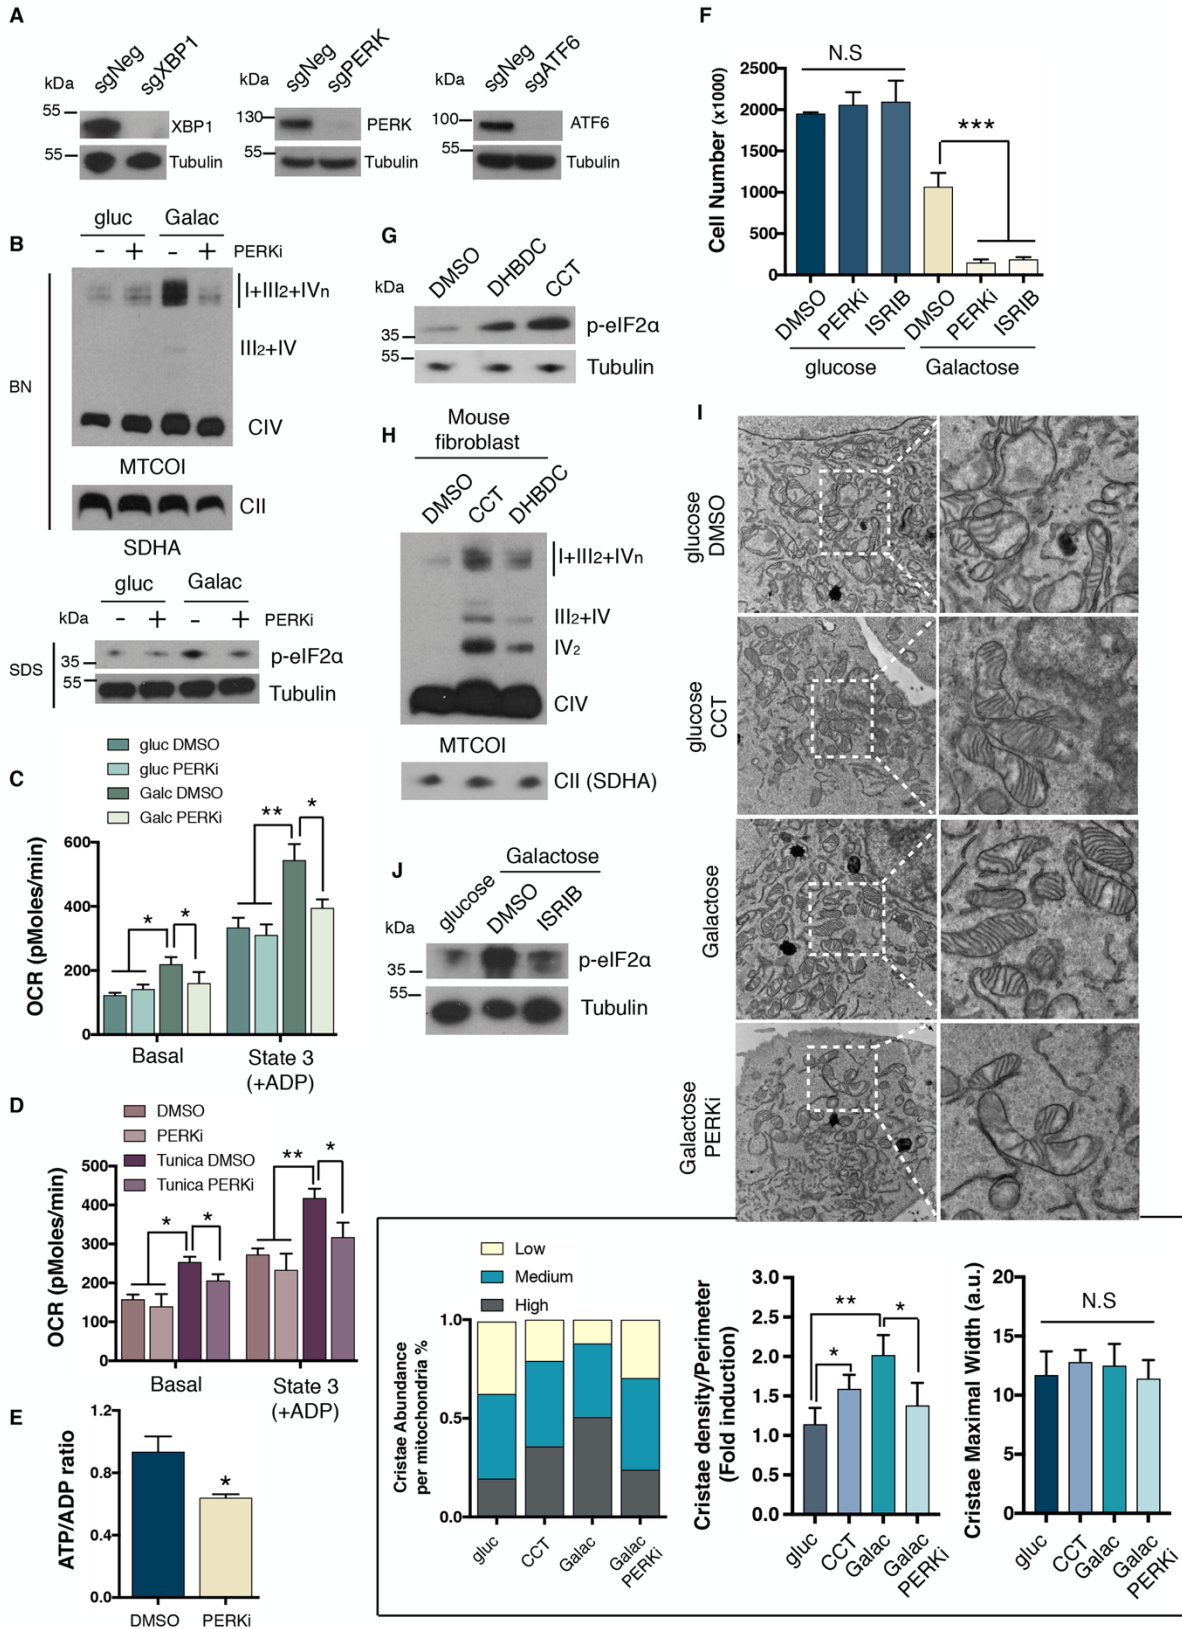

**Figure S3. PERK activation lead to increase ETC supercomplex and mitochondrial cristae.**

**Related to Figure 3**

(A) Levels of XBP1, PERK and ATF6 after their depletion using CRISPR-CAS9 technology. (B) BNGE analysis in glucose or galactose-cultured cells after pharmacological inhibition of PERK. Note that PERK inhibition blocks galactose-induced eIF2 $\alpha$  phosphorylation. (C-D), Basal and state 3 respiration in isolated mitochondria with or without treatment with a PERK inhibitor. Mitochondrial respiration in cells cultured in galactose (C) or tunicamycin treatment for 24h (D). (E) ATP/ADP ratios in galactose-cultured cells after PERK inhibition. (F) Cell proliferation and survival in U2OS cells treated with a PERK inhibitor or eIF2 $\alpha$  inhibitor, ISRIB for 4 days. (G) eIF2 $\alpha$  phosphorylation after PERK activation using DHBDC or CCT020312. (H) Immunodetection of the indicated proteins after BNGE of digitonin-solubilized mitochondria from mouse fibroblast after PERK activation. (I) Galactose-induced eIF2 $\alpha$  phosphorylation blocked by ISRIB. (I) EM analysis of mitochondrial cristae morphology, abundance and density in U2OS cells challenged with PERK activator CCT020312, galactose and galactose plus PERK inhibitor. Data represent average  $\pm$  SEM of three independent experiments. Tubulin or SDHA was used as a loading control. Experiments are the mean  $\pm$  s.e.m., n>3. Asterisks denote \*p<0.05 or \*\*p<0.01. For two comparisons a two-tailed *t*-test was used, for multiple comparisons, one-way ANOVA with Bonferroni post-test was applied. gluc, glucose. Galac, galactose. Tunica, tunicamycin. PERKi, PERK inhibitor GSK2606414. CCT, CCT020312.

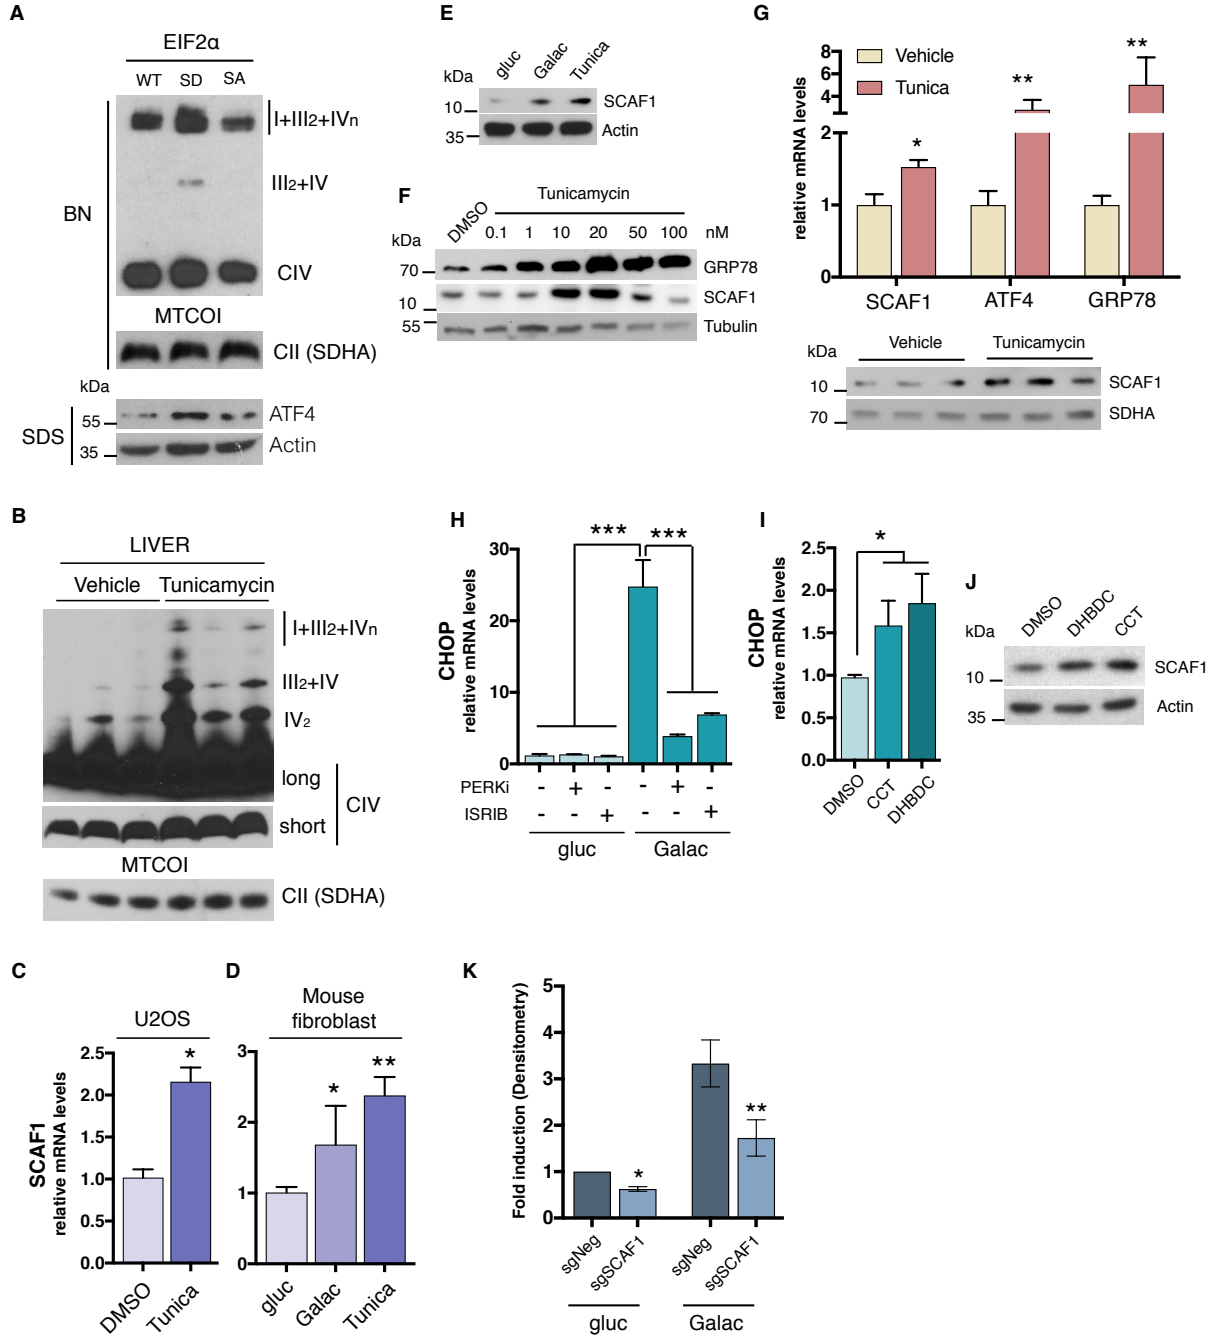

**Figure S4. PERK/eIF2 $\alpha$ /ATF4 axis transcriptionally regulate SCAF1 and promote Supercomplex formation. Related to Figure 3 & 4**

(A) SC levels of U2OS cells transfected with plasmids encoding wildtype (WT), phospho-mimetic (SD) or phospho-deficient (SA) eIF2 $\alpha$ . (B) SC levels of isolated liver mitochondria from mice injected with tunicamycin (0.5 mg/kg) for 2 days. (C) SCAF1 mRNA levels in tunicamycin treated U2OS cells and (D) galactose-grown and tunicamycin treated mouse fibroblast. (E) Western blot analysis showing SCAF1 protein levels in cells cultured under galactose or tunicamycin conditions for 48h. (F) Levels of GRP78 and SCAF1 after treating U2OS cells with increasing doses of tunicamycin for 48h. (G) SCAF1 mRNA and protein levels in livers of vehicle and tunicamycin injected mice. (CHOP mRNA levels, as a readout of PERK activation, in (H) glucose and galactose-grown cells treated with PERKi (GSK2606414 500nM) or eIF2 $\alpha$  phosphorylation inhibitors (ISRIB 200nM) or (I) PERK activators. (J) SCAF1 protein levels 72h after pharmacological PERK activation. (K) I+II<sub>2</sub>+IV<sub>n</sub> bands from Fig 4D were quantified using ImageJ software and the fold induction from glucose to galactose in SCAF1 depleted cells is represented. Immunoblots shown are representative of >3 independent experiments. Actin or SDHA was used as a loading control. All other experiments are the mean  $\pm$  s.e.m., n>3. Asterisks denote \*p<0.05, \*\*p<0.01 or \*\*\*p<0.001. For two comparisons a two-tailed *t*-test was used, for multiple comparisons, one-way ANOVA with Bonferroni post-test was applied. gluc, glucose. Galac, galactose. Tunica, tunicamycin. CCT, CCT020312.



**A**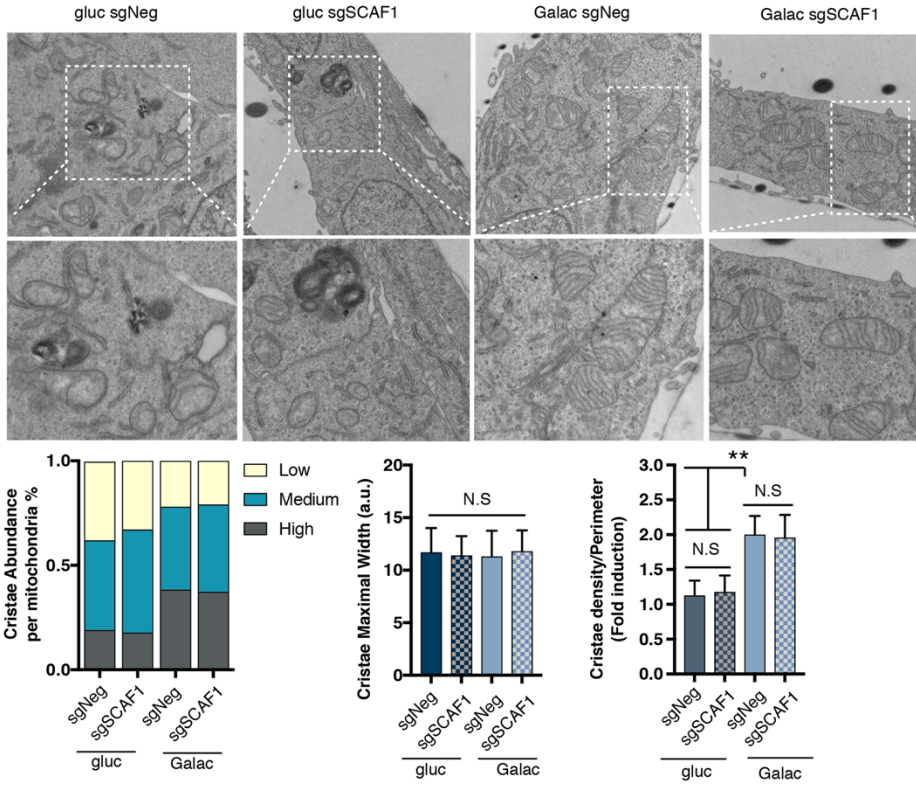**B**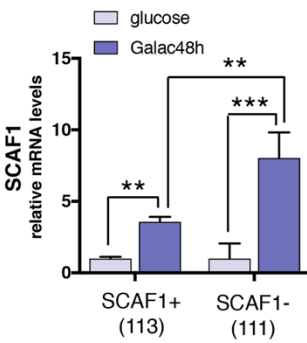**C**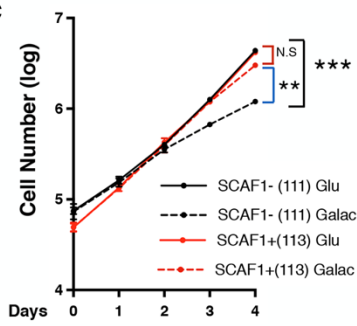**D**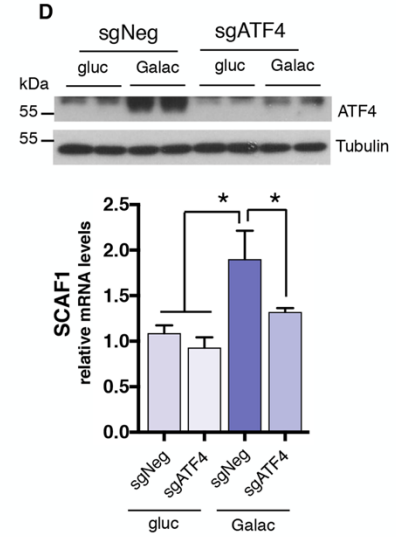**E**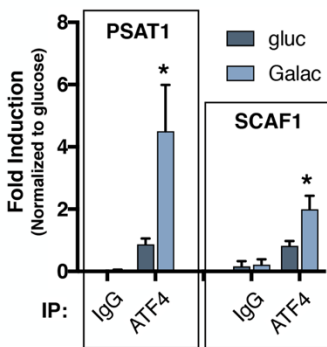**F**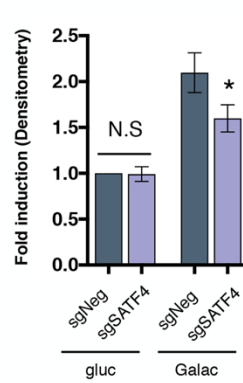

**Figure S5. SCAF1 is target of ATF4 and mediates adaptation to low glucose conditions.**

**Related to Figure 4 & 5**

**(A)** EM analysis of mitochondrial cristae morphology, abundance and density in glucose and galactose-grown U2OS cells with or without SCAF1. Data represent average  $\pm$  SEM of three independent experiments. **(B)** SCAF1 mRNA levels and **(C)** cell growth curves of glucose versus galactose-grown mouse adult fibroblast carrying WT (113) or mutated (111) SCAF1. **(D)** Upper panel; CRISPR-mediated depletion of ATF4 in U2OS cells. Lower panel; SCAF1 mRNA levels in ATF4 depleted cells cultured in glucose or galactose. **(E)** ChIP assay showing ATF4 binding to SCAF1 promoter. The *bona fide* ATF4 target gene PSAT1 was used as a positive control. **(F)** I+III<sub>2</sub>+IV<sub>n</sub> bands were quantified from figure 4H using ImageJ software and fold induction of glucose versus galactose ATF4 depletion is represented. Actin or Tubulin was used as a loading control. Immunoblots shown are representative of >3 independent experiments. Asterisks denote, \* $p < 0.05$ , \*\* $p < 0.01$  or \*\*\* $p < 0.001$ . For two comparisons a two-tailed *t*-test was used, for multiple comparisons, one-way ANOVA with Bonferroni post-test was applied. gluc, glucose. Galac, galactose. PERKi, PERK inhibitor GSK2606414.

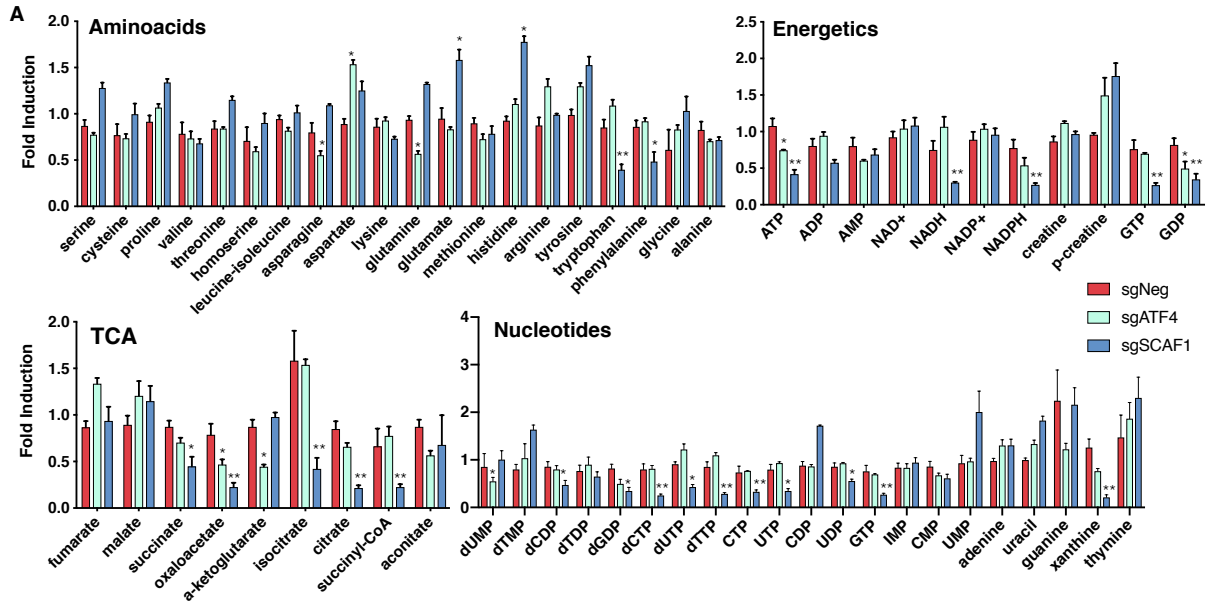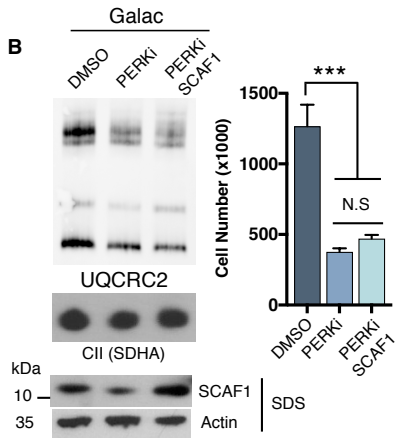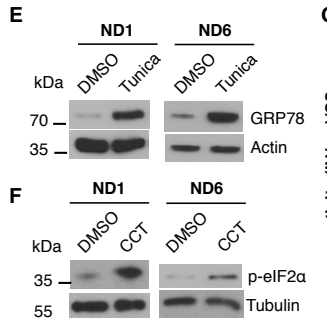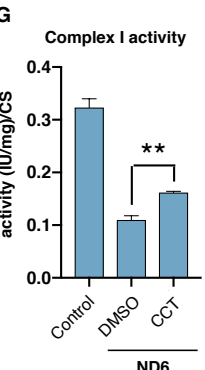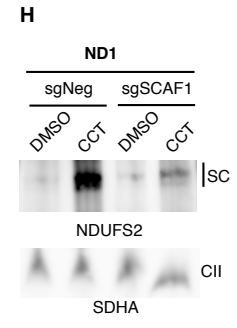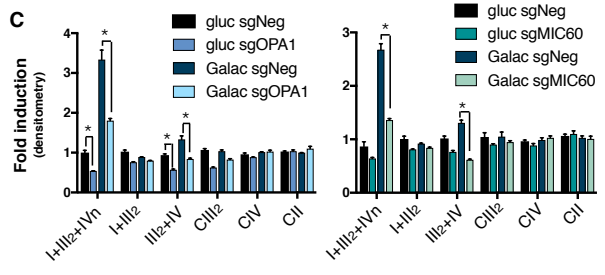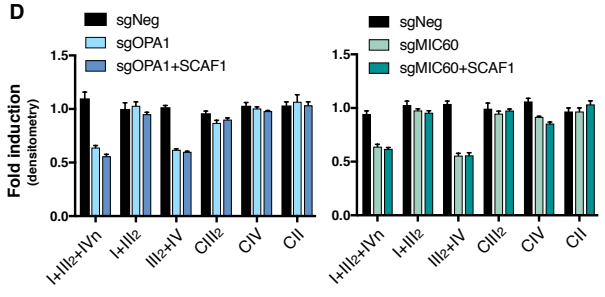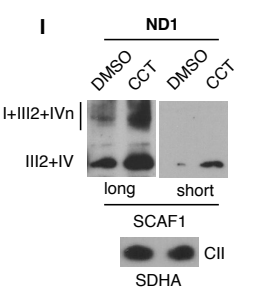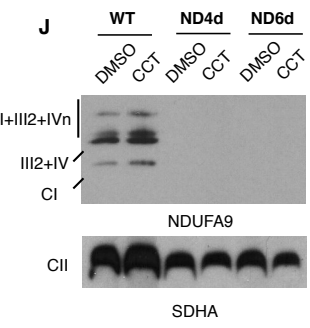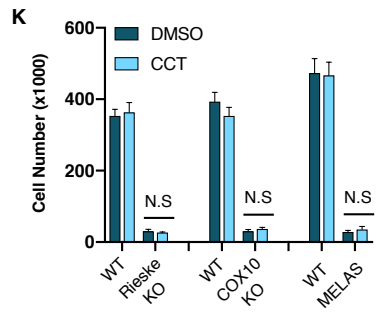

**Figure S6. PERK activation rescues Complex I levels and bioenergetics in mitochondrial mutant cells. Related to Figure 5 & 6**

(A) U2OS sgNeg, sgATF4 and sgSCAF1 cells were culture in galactose media for 48h and intracellular metabolites were extracted and analyzed via LC-MS. Data are means of triplicate wells. (B) SC levels (left) and cell proliferation (right) under galactose, in PERK inhibited cells (for 4 days) with or without ectopic overexpression of SCAF1. Bands from figure 5A (C) or figure 5B (D) were quantified using ImageJ software and represented as fold induction. (E) GRP78 levels were used as a marker of ER stress after tunicamycin treatment (F) eIF2 $\alpha$  phosphorylation levels after CCT020312 treatment. (G) Complex I mitochondrial enzymatic activity in ND6 cells treated with either DMSO or CCT020312 compared to control cybrids. (H) Complex I levels in SC of ND1 sgNeg and sgSCAF1 cells treated for 72h with CCT020312. (I) ND1 cybrid SCAF1 protein levels incorporated into SC formation in the presence or absence of CCT020312. (J) SC levels in WT, ND4d, or ND6d mouse fibroblast treated with DMSO or CCT020312 for 72h. (K) PERK activation did not rescue galactose-induced cell death in tRNA-mutated cybrids (MELAS) or, CIII (Reiske) and CIV (Cox10) Knock-out fibroblasts. Immunoblots shown are representative of >3 independent experiments. Actin, SDHA or Tubulin was used as a loading control. All other experiments are the mean  $\pm$  s.e.m., n>3. Asterisks denote \*\*p<0.01. For two comparisons a two-tailed *t*-test was used, for multiple comparisons, one-way ANOVA with Bonferroni post-test was applied. gluc, glucose. Galac, galactose. Tunica, tunicamycin. CCT, CCT020312.
